# Supplementary material
Source: publisher site journal article supplement (https://www.spandidos-publications.com/7860/downloadSupplementary)
Supplement: Supplementary file 1 [file downloadSupplementary]

**Table SI.** gRNA sequences.

| gRNA   | Sequence, 5'-3'      |
|--------|----------------------|
| sgRNA1 | AGGGTACAATTACACCTGTG |
| sgRNA2 | ACCTACAGATGAGGCCAGGG |
| sgRNA3 | GGAGACAAGGATGACCCCGA |
| sgRNA4 | ACAGAATTAGGGACCTAGAG |

gRNA, guide RNA.

**Table SII.** Primer sequences used to identify mouse genotypes..

| Genotype                 | Primer | Sequence, 5'-3'          | Product size      |
|--------------------------|--------|--------------------------|-------------------|
| <i>PLIN5</i><br>knockout | F1     | ATTTGAACTCATCCTCGTCCCAC  | WT: 1,530 bp;     |
|                          | R1     | TAGTACCATGTCTGATGGCTGCTG | targeted: ~737 bp |
| Wild<br>Type(WT)         | F1     | CTGTGCCCTGATGTAAGTGTTC   | WT: 462 bp;       |
|                          | R1     | AGCATAAACCGTGTGGTGGTG    | targeted: 0 bp    |

F, forward; *PLIN5*, perilipin 5; R, reverse; WT, wild-type. targeted, mutant allele.

**Table SIII.** PCR system for identifying mouse genotypes.

| Segment. | PCR component                                                                  | Volume, $\mu$ l |
|----------|--------------------------------------------------------------------------------|-----------------|
| 1        | 2X Taq Master Mix, Dye Plus<br>(cat. no. P112-03; Vazyme<br>Biotech Co., Ltd.) | 12.5            |
| 2        | ddH <sub>2</sub> O                                                             | 9.5             |
| 3        | Forward primer (10 pmol/ $\mu$ l)                                              | 1               |
| 4        | Reverse primer (10 pmol/ $\mu$ l)                                              | 1               |
| 5        | DNA (~100 ng/ $\mu$ l)                                                         | 1               |

**Table SIV.** PCR program for identify mouse genotypes.

| Segment | Temperature, °C | Time   | Cycle |
|---------|-----------------|--------|-------|
| 1       | 95              | 5 min  | 1x    |
| 2       | 98              | 30 sec | 20x   |
| 3       | 65              | 30 sec |       |
| 4       | 72              | 45 sec |       |
| 5       | 98              | 30 sec | 20x   |
| 6       | 55              | 30 sec |       |
| 7       | 72              | 45 sec |       |
| 8       | 72              | 5 min  | 1x    |
| 9       | 10              | Hold   | 1x    |

**Table SV.** Sequences of the primers used for quantitative polymerase chain reaction.

| Gene         | Sequene (5'-3')         |
|--------------|-------------------------|
| <i>GAPDH</i> |                         |
| Forward      | AGGTCGGTGTGAACGGATTTG   |
| Reverse      | TGTAGACCATGTAGTTGAGGTCA |
| <i>PLIN5</i> |                         |
| Forward      | GAAGTGGGCACAGTGGAGG     |
| Reverse      | AAAGAGTGTTTCATAGGCGAGAT |
| <i>GPX4</i>  |                         |
| Forward      | GCCTGGATAAGTACAGGGGTT   |
| Reverse      | CATGCAGATCGACTAGCTGAG   |
| <i>MYC</i>   |                         |
| Forward      | ATGCCCTCAACGTGAACTTC    |
| Reverse      | GTCGCAGATGAAATAGGGCTG   |
| <i>LTF</i>   |                         |
| Forward      | CCGCTCAGTTGTGTCAAGAAA   |
| Reverse      | CATGGCATCAGCTCTGTTTGT   |
| <i>ATF3</i>  |                         |
| Forward      | GAGGATTTTGCTAACCTGACACC |
| Reverse      | TTGACGGTAACTGACTCCAGC   |
| <i>GDPD5</i> |                         |
| Forward      | AGCCCCTGCAATACTACGAG    |
| Reverse      | CCCCACCAAAGTAGAGCCAG    |
| <i>PRCI</i>  |                         |
| Forward      | CAGATGAGTCTATCACATGCCTG |
| Reverse      | CCTCGGTTCTTTGTAGCCTCT   |
| <i>FSCN1</i> |                         |
| Forward      | GACTGCGAAGGTCGCTACC     |
| Reverse      | CTGATCGGTCTCTTCATCCTGA  |
| <i>PLIN2</i> |                         |
| Forward      | TCCACTGTCCACCTGATTGA    |
| Reverse      | TGGCATGTAGTCTGGAGCTG    |
| <i>CHOP</i>  |                         |
| Forward      | GTCACACGCACATCCCAA      |
| Reverse      | GTTCTTCCTTGCTCTCCTCCTC  |
| <i>CHAC1</i> |                         |
| Forward      | CTGTGGATTTTCGGGTACGG    |
| Reverse      | CCCCTATGGAAGGTGTCTCC    |

*ATF3*, activating transcription factor 3; *CHAC1*, cation transport regulator-like protein 1; *CHOP*, C/EBP homologous protein; F, forward; *FSCN1*, fascin actin-bundling protein 1; *GDPD5*, glycerophosphodiester phosphodiesterase domain containing 5; *GPX4*, glutathione peroxidase 4; *LTF*, lactotransferrin; *PLIN*, perilipin; *PRCI*, protein regulator of cytokinesis 1; R, reverse.

**Table SVI.** Antibodies used for western blotting.

| Antibody          | Supplier                                   | Cat. no.   | Dilution |
|-------------------|--------------------------------------------|------------|----------|
| GAPDH             | Proteintech Group, Inc.                    | 10494-1-AP | 1:5,000  |
| ATF3              | Zen-Bio, Inc.                              | R26444     | 1:500    |
| CHOP              | Shanghai Abways<br>Biotechnology Co., Ltd. | CY6694     | 1:1,000  |
| CHAC1             | Proteintech Group, Inc.                    | 15207-1-AP | 1:2,000  |
| $\alpha$ -tubulin | Proteintech Group, Inc.                    | 11224-1-AP | 1:5,000  |
| GPX4              | Shanghai Abways<br>Biotechnology Co., Ltd. | CY6959     | 1:1,000  |
| PLIN5             | Proteintech Group, Inc.                    | 26951-1-AP | 1:2,000  |
| Goat anti-rabbit  | Proteintech Group, Inc.                    | SA00001-2  | 1:5,000  |

ATF3, activating transcription factor 3; CHAC1, cation transport regulator-like protein 1; CHOP, C/EBP homologous protein; GPX4, glutathione peroxidase 4; PLIN5, perilipin 5.

**Table SVII.** shRNA sequences.

| Gene   | Sequence, 5'-3'       |
|--------|-----------------------|
| shNC   | TTCTCCGAACGTGTCACGT   |
| shATF3 | AGACGAGAGGAACCTCTTTAT |

ATF3, activating transcription factor 3; NC, negative control; sh, short hairpin.
